# Supplementary material
Source: publisher figshare collection journal article supplement (https://sage.figshare.com/ndownloader/files/21301116)
Supplement: Supplementary file 1 [file 21301116]

## Sheet: ESM1
ID	E2 Time	E2 present	LH Time	LH present	Both LH and E2 present	LH without E2	E2 without LH	Days E2 drop after LH surge	E2 < 3days after LH	Lh before E2	Cycle Leangth
1	x	0	x	0	0	0	0	x	0	0	26
2	-13	1	x	0	0	0	1	x	0	0	26
3	-14	1	-14	1	1	0	0	0	1	1	28
4	-18	1	-14	1	1	0	0	-4	0	0	29
5	-14	1	-13	1	1	0	0	-1	0	0	25
6	-18	1	x	0	0	0	1	x	0	0	36
7	X	0	-13	1	0	1	0	x	0	0	26
8	x	0	x	0	0	0	0	x	0	0	25
9	-15	1	-15	1	1	0	0	0	1	1	26
10	-16	1	-14	1	1	0	0	-2	0	0	28
11	-14	1	x	0	0	0	1	x	0	0	28
12	-12	1	x	0	0	0	1	x	0	0	27
13	-12	1	-10	1	1	0	0	-2	1	0	27
14	x	0	x	0	0	0	0	x	0	0	34
15	-12	1	-16	1	1	0	0	4	0	1	25
16	-10	1	-14	1	1	0	0	4	0	1	26
17	-13	1	-16	1	1	0	0	3	0	1	26
18	-16	1	-17	1	1	0	0	1	1	1	26
19	-16	1	x	0	0	0	1	x	0	0	28
20	-13	1	-16	1	1	0	0	3	0	1	28
21	-17	1	-17	1	1	0	0	0	1	1	32
22	-14	1	-15	1	1	0	0	1	1	1	25
23	-15	1	-16	1	1	0	0	1	1	1	27
24	-13	1	-14	1	1	0	0	1	1	1	29
25	-9	1	-15	1	1	0	0	6	0	1	32
26	x	0	-23	1	0	1	0	x	0	0	31
27	-12	1	-13	1	1	0	0	1	1	1	27
28	-15	1	-14	1	1	0	0	-1	0	0	31
29	-16	1	-14	1	1	0	0	-2	0	0	24
30	-17	1	x	0	0	0	1	x	0	0	25
31	-14	1	-14	1	1	0	0	0	1	1	26
32	-12	1	-15	1	1	0	0	3	0	1	31
33	-14	1	-12	1	1	0	0	-2	0	0	27
34	-14	1	-15	1	1	0	0	1	1	1	28
35	-12	1	-17	1	1	0	0	5	0	1	32
36	-16	1	-13	1	1	0	0	-3	0	0	35
37	-9	1	-12	1	1	0	0	3	0	1	27
38	-12	1	-16	1	1	0	0	4	0	1	33
39	-12	1	-15	1	1	0	0	3	0	1	28
40	-10	1	-16	1	1	0	0	6	0	1	32
41	-15	1	-16	1	1	0	0	1	1	1	30
42	-14	1	-15	1	1	0	0	1	1	1	27
43	x	0	x	0	0	0	0	x	0	0	27
44	x	0	x	0	0	0	0	x	0	0	34
45	-8	1	-14	1	1	0	0	6	0	1	30
46	-15	1	-17	1	1	0	0	2	1	1	28
47	-10	1	-13	1	1	0	0	3	0	1	24
48	-11	1	-12	1	1	0	0	1	1	1	27
49	-10	1	x	0	0	0	1	x	0	0	29
50	-12	1	-17	1	1	0	0	5	0	1	29
51	-10	1	x	0	0	0	1	x	0	0	24
52	-9	1	-12	1	1	0	0	3	0	1	26
53	-10	1	-14	1	1	0	0	4	0	1	28
54	-12	1	x	0	0	0	1	x	0	0	26
55	-10	1	-15	1	1	0	0	5	0	1	30
56	-14	1	x	0	0	0	1	x	0	0	27
57	-8	1	x	0	0	0	1	x	0	0	32
58	-14	1	-14	1	1	0	0	0	1	1	29
59	-10	1	-12	1	1	0	0	2	1	1	22
60	-18	1	x	0	0	0	1	x	0	0	30
61	-12	1	-13	1	1	0	0	1	1	1	26
62	-14	1	-14	1	1	0	0	0	1	1	31
63	-15	1	x	0	0	0	1	x	0	0	29
64	-14	1	-18	1	1	0	0	4	0	1	30
65	-13	1	-15	1	1	0	0	2	1	1	29
66	-6	1	-9	1	1	0	0	3	0	1	25
67	-8	1	-10	1	1	0	0	2	1	1	27
68	-15	1	-15	1	1	0	0	0	1	1	25
69	-16	1	-12	1	1	0	0	-4	0	0	24
70	-15	1	-14	1	1	0	0	-1	0	0	29
71	-14	1	-15	1	1	0	0	1	1	1	26
72	-14	1	x	0	0	0	1	x	0	0	28
73	-14	1	x	0	0	0	1	x	0	0	31
74	-10	1	-21	1	1	0	0	11	0	0	36
75	-13	1	x	0	0	0	1	x	0	1	34
76	-15	1	-17	1	1	0	0	2	1	1	32
77	-17	1	-16	1	1	0	0	-1	0	0	29
78	-11	1	-12	1	1	0	0	1	1	1	28
79	-13	1	x	0	0	0	1	x	0	0	27
80	-16	1	x	0	0	0	1	x	0	0	29
81	-19	1	x	0	0	0	1	x	0	0	29
82	-16	1	x	0	0	0	1	x	0	0	34
83	-9	1	-15	1	1	0	0	6	0	1	27
84	-14	1	-10	1	1	0	0	-4	0	0	27
85	-13	1	-14	1	1	0	0	1	1	1	28
86	x	0	-10	1	0	1	0	x	0	0	25
87	-15	1	-15	1	1	0	0	0	1	1	27
88	-16	1	-16	1	1	0	0	0	1	1	32
89	-16	1	-14	1	1	0	0	-2	0	0	27
90	-11	1	-14	1	1	0	0	3	0	1	23
91	x	0	-15	1	0	1	0	x	0	0	29
92	-12	1	x	0	0	0	1	x	0	0	32
93	-14	1	-14	1	1	0	0	0	1	1	29
94	x	0	-14	1	0	1	0	x	0	0	29
95	x	0	-18	1	0	1	0	x	0	0	28
96	-7	1	-8	1	1	0	0	1	1	1	24
97	-14	1	-16	1	1	0	0	2	1	1	28
98	-14	1	x	0	0	0	1	x	0	0	31
99	-16	1	-16	1	1	0	0	0	1	1	30
100	-12	1	-16	1	1	0	0	4	0	1	27
101	-15	1	-11	1	1	0	0	-4	0	0	21
102	-14	1	-13	1	1	0	0	-1	0	0	28
